# Supplementary material for: Integration of lignin microcapsulated pesticide production into lignocellulose biorefineries through FeCl3-mediated deep eutectic solvent pretreatment
Source: Royal Society of Chemistry journal article supplement (doi:10.1039/d2gc01255c), 2022-01-01
Supplement: d2gc01255c1.pdf [file d2gc01255c1.pdf]

# Supporting information

## **Integration of lignin microcapsule pesticide production into lignocellulose biorefinery through FeCl<sub>3</sub>-mediated deep eutectic solvents pretreatment**

Feiyue Shen,<sup>a</sup> Shiyu Wu,<sup>a</sup> Mei Huang,<sup>a</sup> Li Zhao<sup>a</sup>, Jinsong He<sup>a</sup>, Yanzong Zhang<sup>b</sup>,  
Shihuai Deng<sup>b</sup>, Jinguang Hu<sup>c</sup>, Dong Tian<sup>\*a</sup> and Fei Shen<sup>\*a</sup>

*a. Institute of Ecological and Environmental Sciences, Sichuan Agricultural University,  
Chengdu, Sichuan 611130, PR China*

*b. College of Environmental Science, Sichuan Agricultural University, Chengdu,  
Sichuan 611130, PR China*

*c. Department of Chemical and Petroleum Engineering, University of Calgary, 2500  
University Dr. NW, Calgary, AB T2N 1N4, Canada*

\* Corresponding author

Dong Tian, E-mail: dongtian@sicau.edu.cn. Tel: +86-28-86293087

Fei Shen, E-mail: fishen@sicau.edu.cn. Tel: +86-28-86293087

**Content list:**

Six tables (Table S1, S2, S3, S4, S5 and S6)

Four figs (Fig S1, S2, S3 and S4)

**Table S1.** Residual carbohydrates content in regenerated lignins of FeCl<sub>3</sub>-mediated DESs extraction.

| Carbohydrates (%) | ChCl/LA-FeCl <sub>3</sub> | ChCl/Gly-FeCl <sub>3</sub> | K <sub>2</sub> CO <sub>3</sub> /Gly-FeCl <sub>3</sub> |
|-------------------|---------------------------|----------------------------|-------------------------------------------------------|
| Glucose           | 0.59                      | 0.86                       | 5.26                                                  |
| Xylose            | 0.01                      | 0.28                       | 0.95                                                  |
| Total             | 0.60                      | 1.04                       | 6.21                                                  |

**Table S2.** The content Fe element of obtained substrates pretreated by FeCl<sub>3</sub>-mediated DESs

| Sample                                                            | Fe (mg g <sup>-1</sup> ) |
|-------------------------------------------------------------------|--------------------------|
| Bamboo                                                            | 0.21                     |
| ChCl/LA-FeCl <sub>3</sub> (cellulose)                             | 0.54                     |
| ChCl/LA-FeCl <sub>3</sub> (lignin)                                | 0.41                     |
| ChCl/Gly-FeCl <sub>3</sub> (cellulose)                            | 1.51                     |
| ChCl/Gly-FeCl <sub>3</sub> (lignin)                               | 0.51                     |
| K <sub>2</sub> CO <sub>3</sub> /Gly-FeCl <sub>3</sub> (cellulose) | 7.02                     |
| K <sub>2</sub> CO <sub>3</sub> /Gly-FeCl <sub>3</sub> (lignin)    | 4.59                     |

**Table S3.** Assignment of main <sup>13</sup>C-<sup>1</sup>H cross-signals in HSQC spectra of these DES lignins.

| label                                                                    | $\delta_C/\delta_H$ (ppm) | assignment                                                                                                                 |
|--------------------------------------------------------------------------|---------------------------|----------------------------------------------------------------------------------------------------------------------------|
| B <sub><math>\beta</math></sub>                                          | 53.5/3.06                 | C <sub><math>\beta</math></sub> -H <sub><math>\beta</math></sub> in $\beta$ - $\beta$ (resinol) substructures (B)          |
| -OCH <sub>3</sub>                                                        | 55.6/3.73                 | C-H in methoxyls                                                                                                           |
| A <sub><math>\gamma</math></sub>                                         | 59.5/3.20–3.63            | C <sub><math>\gamma</math></sub> -H <sub><math>\gamma</math></sub> in $\beta$ -O-4 substructures (A)                       |
| L <sub>2</sub>                                                           | 66.0/4.21                 | C <sub>2</sub> -H <sub>2</sub> in lactic acid (L)                                                                          |
| A <sub><math>\alpha</math></sub>                                         | 71.8/4.86                 | C <sub><math>\alpha</math></sub> -H <sub><math>\alpha</math></sub> in $\beta$ -O-4 linked to S units (A)                   |
| A <sub><math>\beta</math>(G)</sub> / A' <sub><math>\beta</math>(S)</sub> | 83.9/4.29                 | C <sub><math>\beta</math></sub> -H <sub><math>\beta</math></sub> in $\beta$ -O-4 substructures linked to G and H units (A) |
| B <sub><math>\alpha</math></sub>                                         | 84.8/4.65                 | C <sub><math>\alpha</math></sub> -H <sub><math>\alpha</math></sub> in $\beta$ - $\beta$ (resinol) substructures (B)        |
| A <sub><math>\beta</math>(S)</sub>                                       | 85.9/4.12                 | C <sub><math>\beta</math></sub> -H <sub><math>\beta</math></sub> in $\beta$ -O-4 substructures linked to S units (A)       |
| C <sub><math>\alpha</math></sub>                                         | 86.8/5.46                 | C <sub><math>\alpha</math></sub> -H <sub><math>\alpha</math></sub> in phenylcoumaran substructures (C)                     |
| S <sub>2,6</sub>                                                         | 103.8/6.71                | C <sub>2,6</sub> -H <sub>2,6</sub> in etherified syringyl units (S)                                                        |
| S' <sub>2,6</sub>                                                        | 106.2/7.32                | C <sub>2,6</sub> -H <sub>2,6</sub> in oxidized (C <sub><math>\alpha</math></sub> =O) syringyl units (S')                   |
| G <sub>2</sub>                                                           | 110.9/6.98                | C <sub>2</sub> -H <sub>2</sub> in guaiacyl units (G)                                                                       |
| PCE <sub>8</sub>                                                         | 114.2/6.27                | C <sub>8</sub> -H <sub>8</sub> in <i>p</i> -coumarate (PCE)                                                                |
| G <sub>5</sub>                                                           | 114.9/6.77                | C <sub>2</sub> -H <sub>2</sub> in guaiacyl units (G)                                                                       |
| G <sub>6</sub>                                                           | 119.0/6.80                | C <sub>6</sub> -H <sub>6</sub> in guaiacyl units (G)                                                                       |
| H <sub>2,6</sub>                                                         | 127.9/7.19                | C <sub>2,6</sub> -H <sub>2,6</sub> in <i>p</i> -hydroxyphenyl units (H)                                                    |

|                    |            |                                                                 |
|--------------------|------------|-----------------------------------------------------------------|
| PCE <sub>2,6</sub> | 130.2/7.48 | C <sub>2,6</sub> -H <sub>2,6</sub> in <i>p</i> -coumarate (PCE) |
|--------------------|------------|-----------------------------------------------------------------|

**Table S4.** Major covalent bond content of lignins quantified by 2D-HSQC spectra (results expressed as the number of moieties per 100 Aromatic rings).

| Covalent bond                                         | $\beta$ -O-4 | $\beta$ - $\beta$ | $\beta$ -5 | S/G  |
|-------------------------------------------------------|--------------|-------------------|------------|------|
| MWL                                                   | 52.08        | 8.53              | 7.31       | 1.21 |
| ChCl/LA                                               | 21.23        | 3.52              | <0.1       | 2.37 |
| ChCl/LA-FeCl <sub>3</sub>                             | <0.1         | <0.1              | <0.1       | –    |
| ChCl/Gly                                              | 44.29        | 7.01              | 8.73       | 1.28 |
| ChCl/Gly-FeCl <sub>3</sub>                            | 15.86        | <0.1              | <0.1       | 1.66 |
| K <sub>2</sub> CO <sub>3</sub> /Gly                   | 40.32        | 5.92              | 4.16       | 2.24 |
| K <sub>2</sub> CO <sub>3</sub> /Gly-FeCl <sub>3</sub> | 8.52         | <0.1              | <0.1       | –    |

**Table S5.** Assignment and quantification of signals of <sup>13</sup>C NMR spectra (results expressed as number of moieties per Aromatic ring).

| Chemical shift (ppm)                                  | 58-54             | 124-102           | 140-124           | 156-140           | 125-102                             |
|-------------------------------------------------------|-------------------|-------------------|-------------------|-------------------|-------------------------------------|
| Assignment                                            | -OCH <sub>3</sub> | C <sub>Ar-H</sub> | C <sub>Ar-C</sub> | C <sub>Ar-O</sub> | degree of condensation <sup>a</sup> |
| MWL                                                   | 2.08              | 2.07              | 1.9               | 1.86              | 0.94                                |
| ChCl/LA                                               | 2.03              | 1.76              | 1.98              | 2.04              | 1.27                                |
| ChCl/LA-FeCl <sub>3</sub>                             | 1.29              | 1.40              | 1.95              | 2.22              | 1.57                                |
| ChCl/Gly                                              | 1.83              | 1.99              | 1.96              | 1.88              | 1.04                                |
| ChCl/Gly-FeCl <sub>3</sub>                            | 1.13              | 2.33              | 2.35              | 1.59              | 1.12                                |
| K <sub>2</sub> CO <sub>3</sub> /Gly                   | 2.45              | 2.06              | 1.49              | 2.04              | 0.91                                |
| K <sub>2</sub> CO <sub>3</sub> /Gly-FeCl <sub>3</sub> | 1.98              | 1.83              | 1.73              | 2.07              | 1.13                                |

<sup>a</sup>Calculated from  $3.00 - I_{125-102}$

**Table S6.** AVM loading and encapsulation efficiency of AVM-loaded lignin nanospheres.

| Shell material                                            | Encapsulation efficiency (%) | AVM loading (%) |
|-----------------------------------------------------------|------------------------------|-----------------|
| LNS-ChCl/LA-FeCl <sub>3</sub>                             | 80.72                        | 20.18           |
| LNS-ChCl/Gly-FeCl <sub>3</sub>                            | 81.83                        | 20.46           |
| LNS-K <sub>2</sub> CO <sub>3</sub> /Gly-FeCl <sub>3</sub> | 44.10                        | 11.21           |

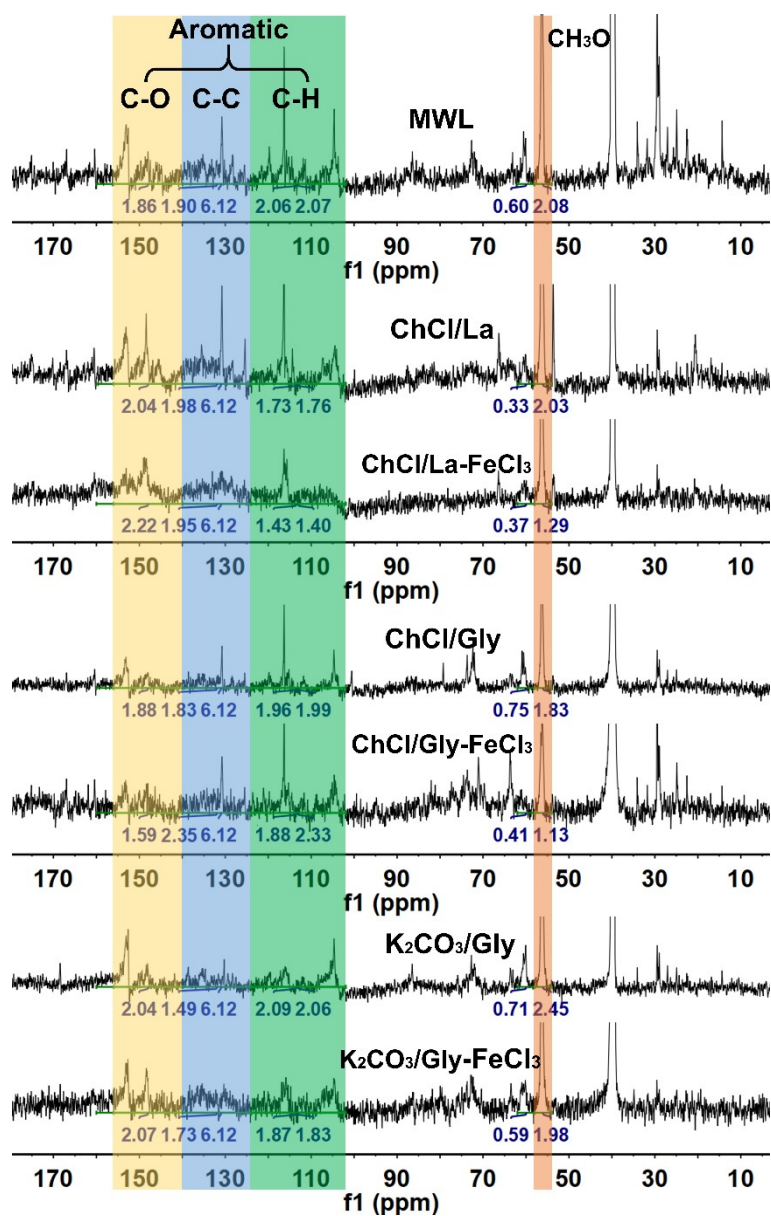

**Fig. S1.** Quantitative  $^{13}\text{C}$  NMR spectra of MWL and DES lignins.

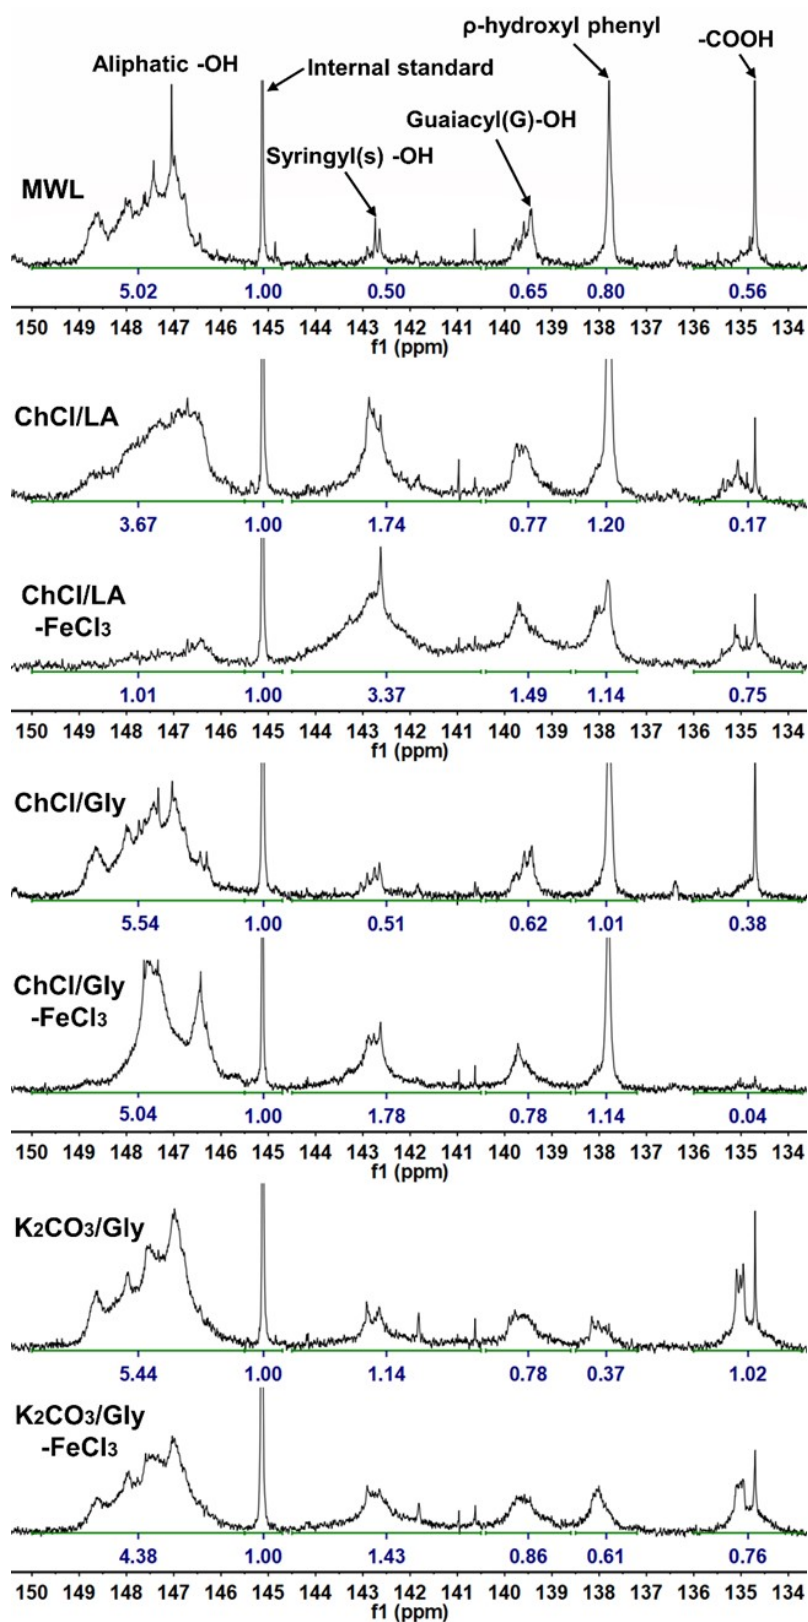

**Fig. S2.** Quantitative  $^{31}\text{P}$  NMR spectra of MWL and regenerated lignins.

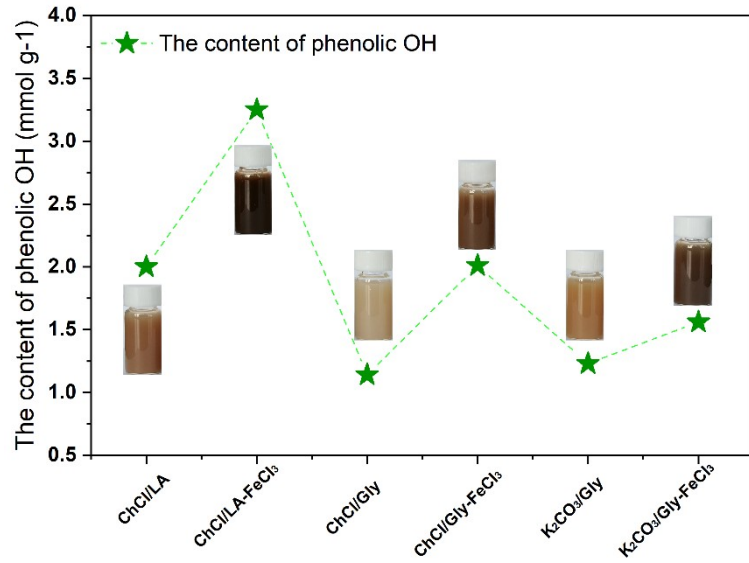

**Fig. S3.** The content of phenolic-OH and its corresponding digital photo of these DES lignin nanospheres.

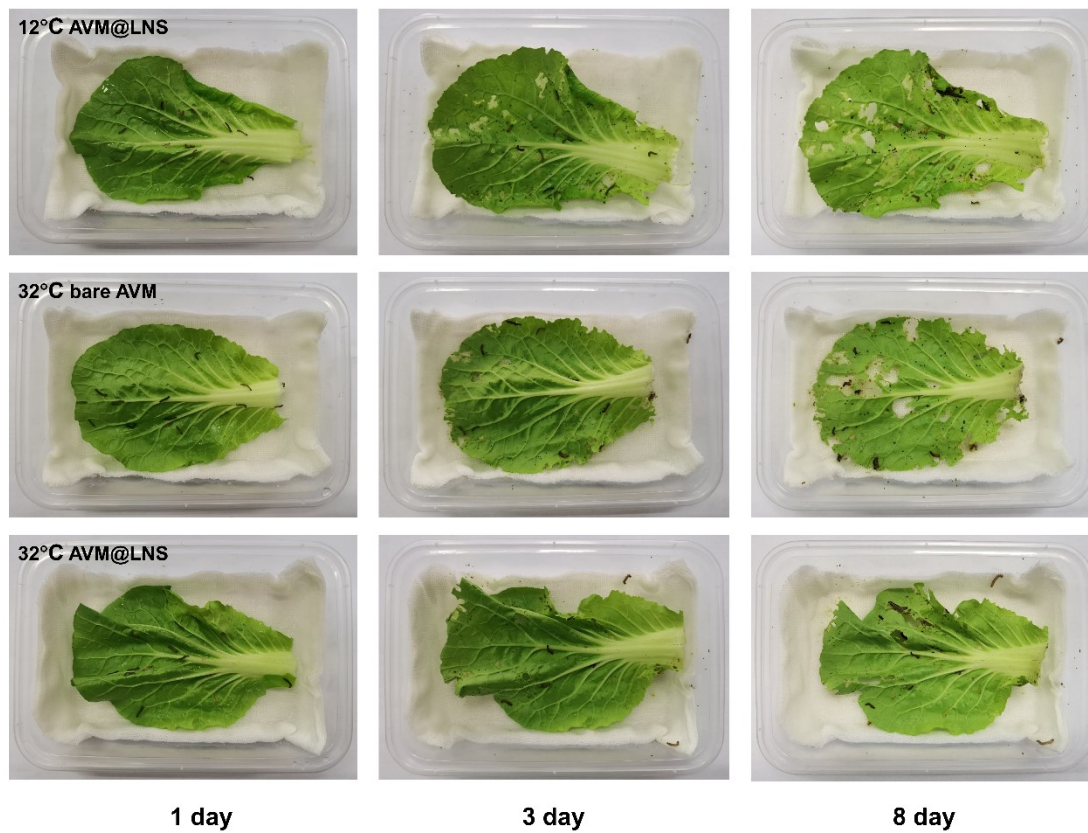

**Fig. S4.** Photographs of Baby Bok Choy after feeding *Mythismna separata* at different times.
