# Supplementary material for: Integration of lignin microcapsulated pesticide production into lignocellulose biorefineries through FeCl3-mediated deep eutectic solvent pretreatment
Source: Royal Society of Chemistry journal article supplement (doi:10.1039/d2gc01255c), 2022-01-01
Supplement: d2gc01255c2.pdf [file d2gc01255c2.pdf]

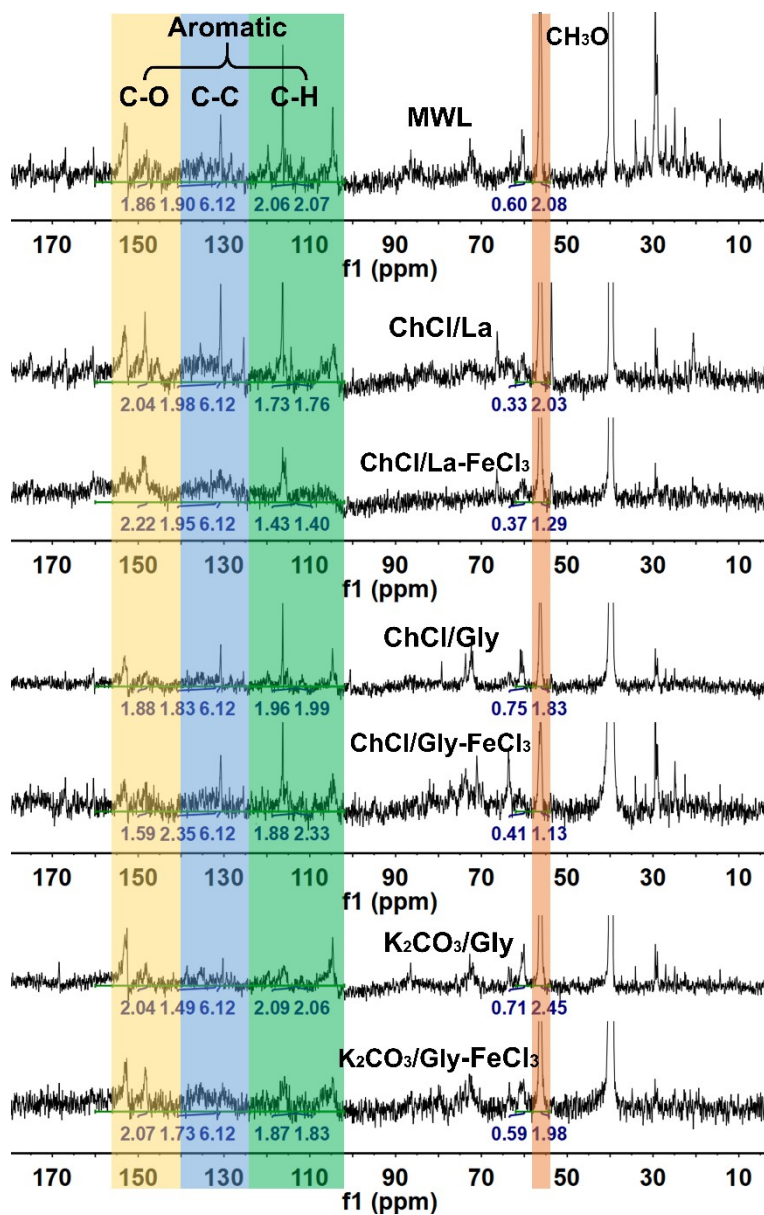

**Fig. S1.** Quantitative  $^{13}\text{C}$  NMR spectra of MWL and DES lignins.

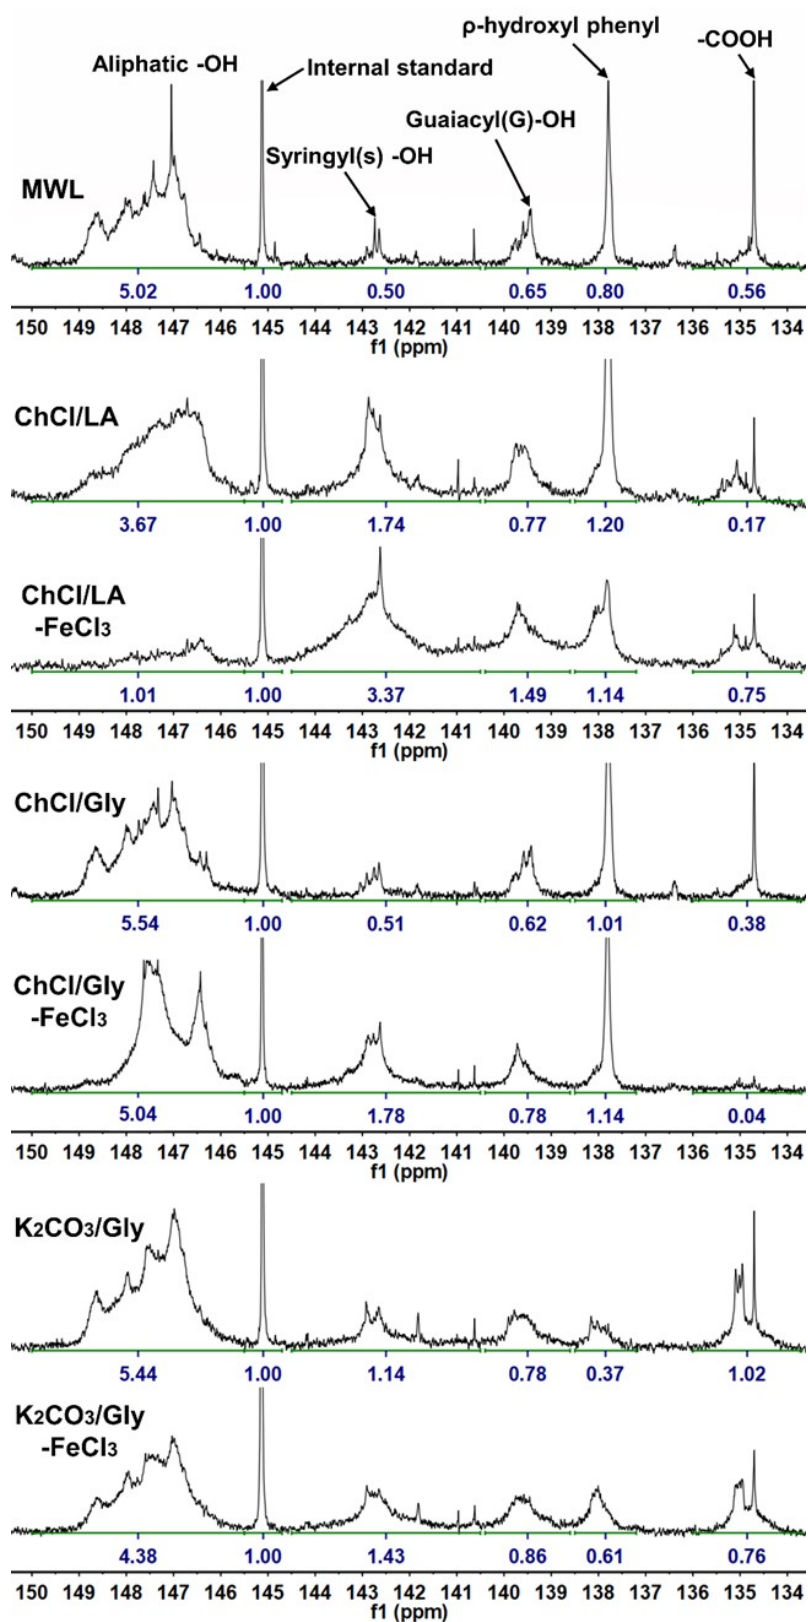

**Fig. S2.** Quantitative  $^{31}\text{P}$  NMR spectra of MWL and regenerated lignins.

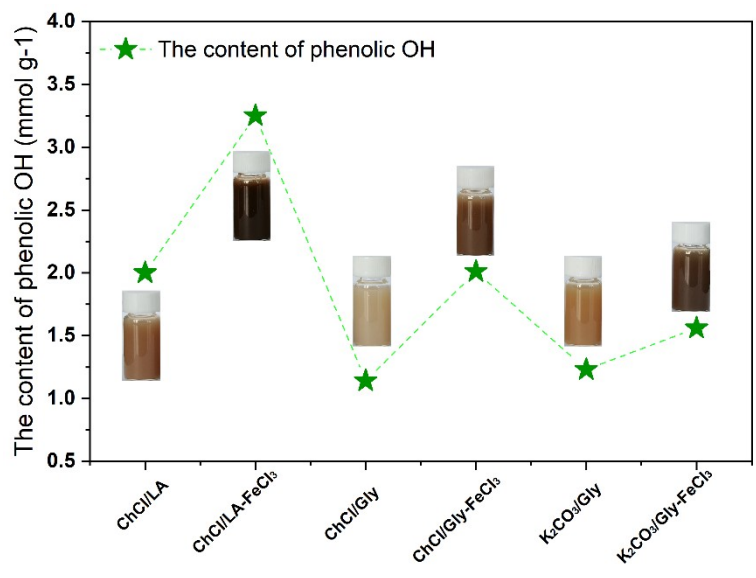

**Fig. S3.** The content of phenolic-OH and its corresponding digital photo of these DES lignin nanospheres.

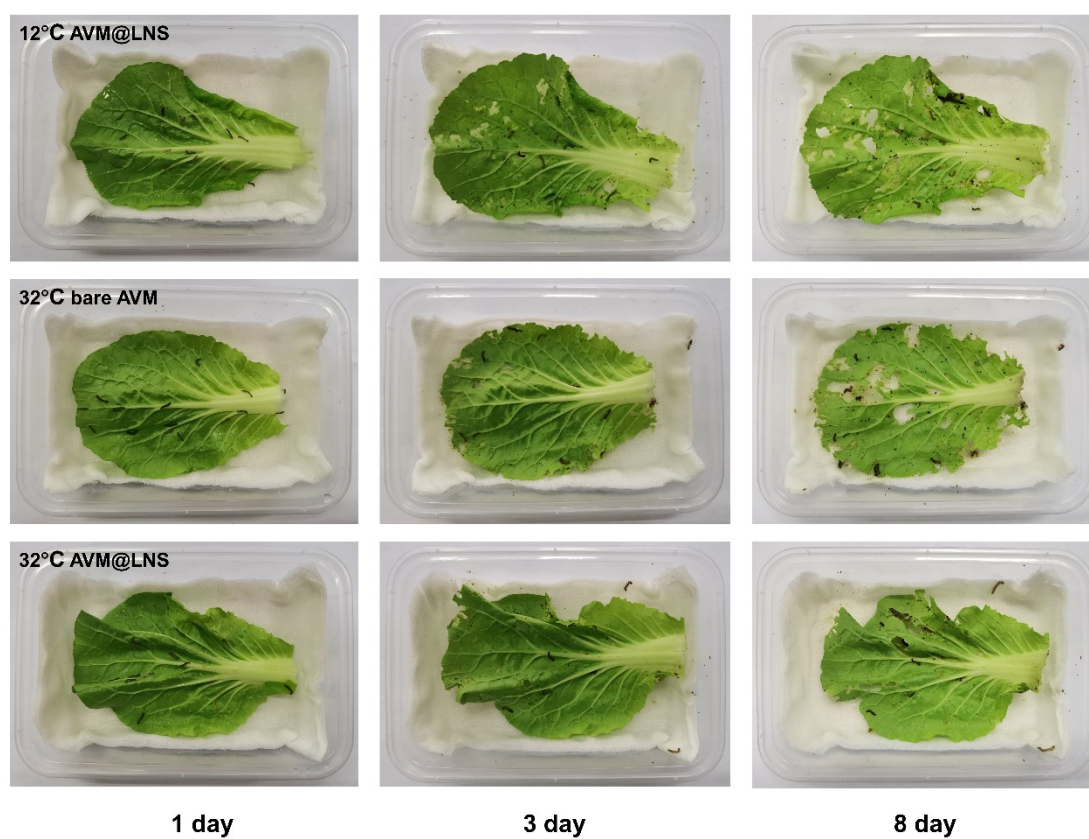

**Fig. S4.** Photographs of Baby Bok Choy after feeding *Mythismna separata* at different times.
